# Supplementary material for: Predicting Antibiotic-Associated Virulence of Pseudomonas aeruginosa Using an ex vivo Lung Biofilm Model
Source: PubMed Central journal article supplement (PMC7492588; doi:10.3389/fmicb.2020.568510), 2020-09-02
Supplement: Data_Sheet_1.pdf [file Data_Sheet_1.pdf]

## Supplementary Material

### Predicting antibiotic-associated virulence of *Pseudomonas aeruginosa* using an *ex-vivo* lung biofilm model

Marwa M. Hassan<sup>\*1,2</sup>, Niamh E. Harrington<sup>1</sup>, Esther Sweeney<sup>1</sup> and Freya Harrison<sup>1</sup>

<sup>1</sup>School of Life Sciences, University of Warwick, Coventry, CV4 7AL, United Kingdom

<sup>2</sup>Department of Pathology and Infectious Diseases, School of Veterinary Medicine, University of Surrey, Guildford, GU2 7AL, United Kingdom

**\* Correspondence:**

Corresponding Author

[m.hussainalihassan@surrey.ac.uk](mailto:m.hussainalihassan@surrey.ac.uk)

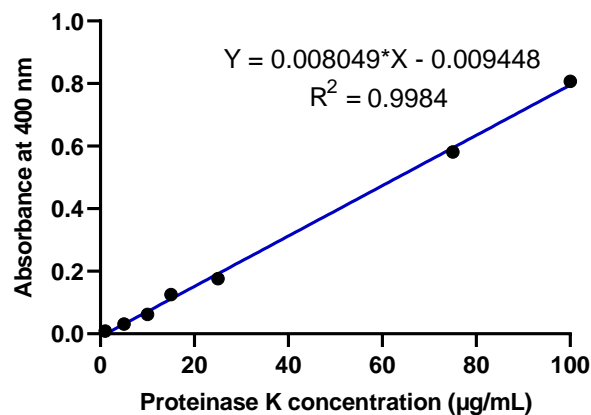

**Supplementary Figure S1.** Proteinase K standard curve. Proteinase K standard curve was used to calculate the concentration of total protease produced by *P. aeruginosa* using the azocasein assay.

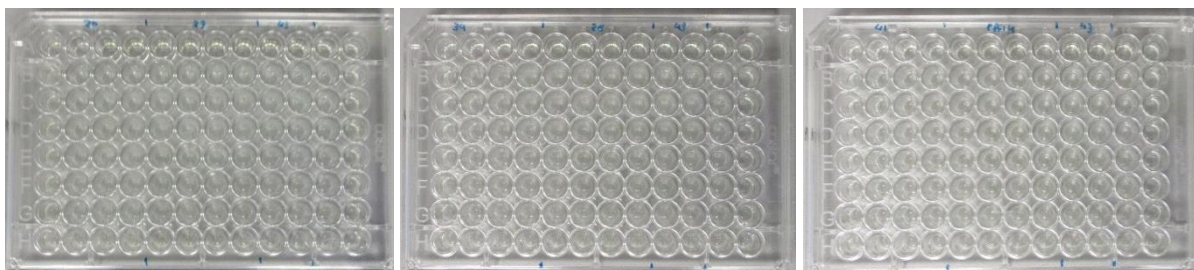

**Supplementary Figure S2.** MBEC recovery plates at 6 hour incubation of all tested bacterial strains. There was no visual or plate reader detection of pyochelin, pyoverdine or pyocyanin.

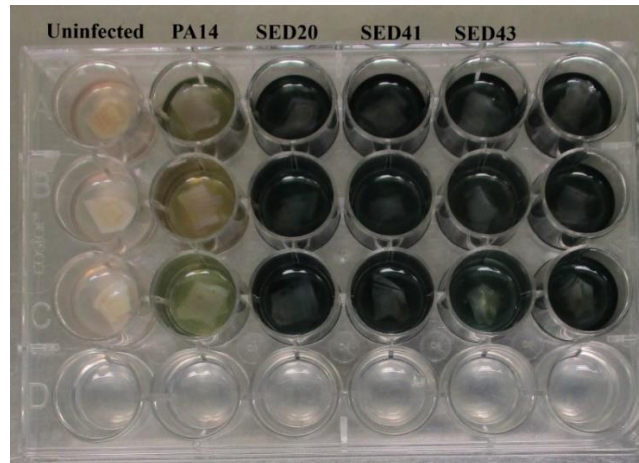

**Supplementary Figure S3.** Uninfected and *P. aeruginosa* infected EVPL tissues after 7 days of biofilm formation.

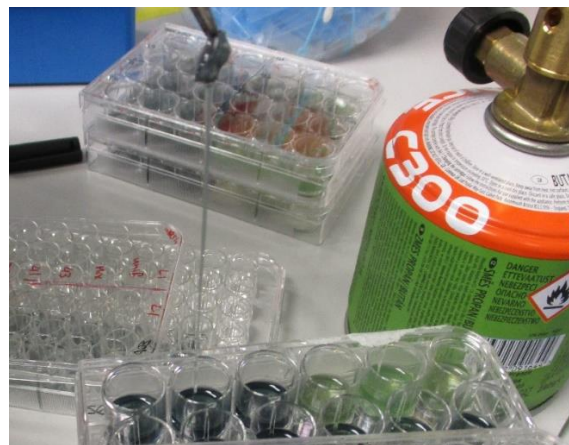

**Supplementary Figure S4.** Mucoïd phenotype of clinical strains after biofilm formation for 7 days.

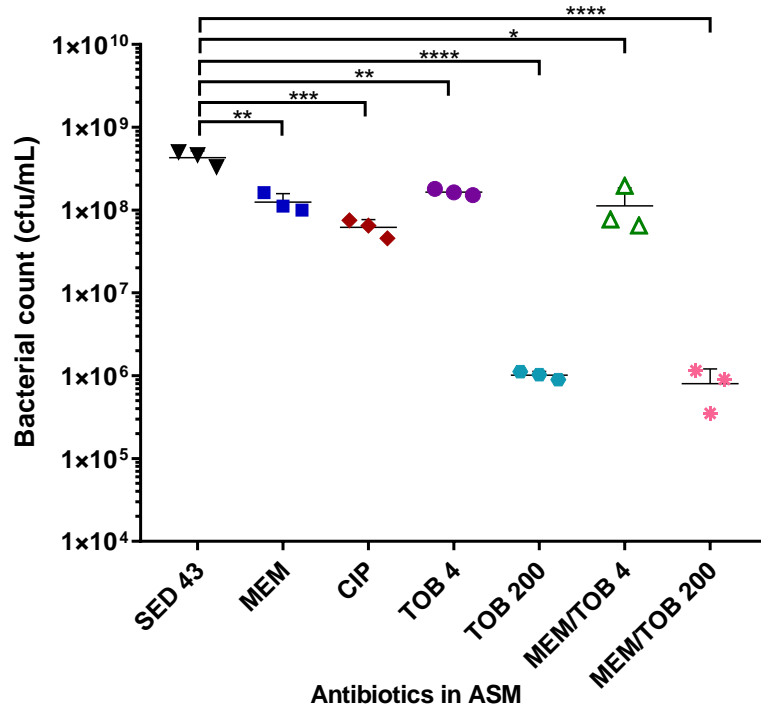

Supplementary Figure S5. Bacterial load in the EVPL with different antibiotics in ASM.

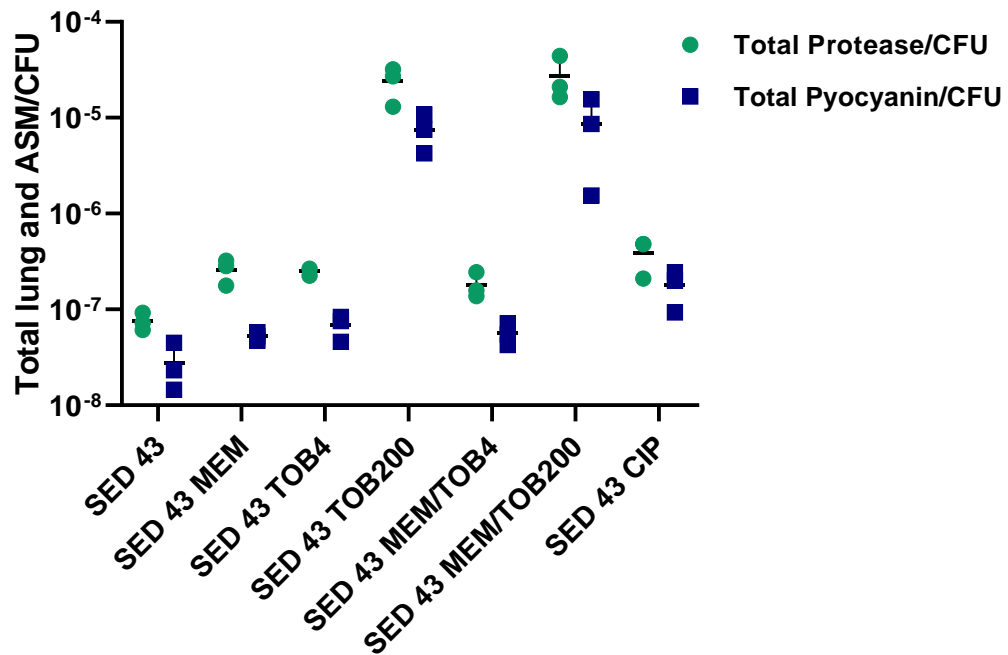

Supplementary Figure S6. Total amount of produced protease and pyocyanin/cfu in both tissue and ASM.

**Supplementary Table S1.** The concentration of protease and pyocyanin produced in the tissues and surrounding ASM.

| Strains/conditions        | Concentration of ( $\mu\text{g/mL}$ ) |                   |                 |                  |
|---------------------------|---------------------------------------|-------------------|-----------------|------------------|
|                           | Protease                              |                   | Pyocyanin       |                  |
|                           | Tissue                                | ASM               | Tissue          | ASM              |
| <b>Uninfected</b>         | 0.54 $\pm$ 0.34                       | 1.91 $\pm$ 0.21   | NA              | NA               |
| <b>Uninfected MEM</b>     | 1.49 $\pm$ 0.19                       | 2.01 $\pm$ 0.2    | NA              | NA               |
| <b>PA14</b>               | 6.00 $\pm$ 0.62                       | 63.95 $\pm$ 4.95  | 2.11 $\pm$ 0.7  | 8.05 $\pm$ 3.07  |
| <b>PA14 MEM</b>           | 12.12 $\pm$ 2.73                      | 76.22 $\pm$ 12.02 | 6.85 $\pm$ 3.48 | 3.94 $\pm$ 2.96  |
| <b>SED 20</b>             | 4.97 $\pm$ 1.63                       | 38.88 $\pm$ 10.52 | 5.93 $\pm$ 2.42 | 9.56 $\pm$ 1.44  |
| <b>SED 20 MEM</b>         | 7.04 $\pm$ 4.80                       | 50.86 $\pm$ 18    | 3.45 $\pm$ 2.62 | 7.02 $\pm$ 0.75  |
| <b>SED 41</b>             | 3.27 $\pm$ 1.92                       | 27.24 $\pm$ 13.61 | 2.82 $\pm$ 1.72 | 5.11 $\pm$ 1.10  |
| <b>SED 41 MEM</b>         | 5.76 $\pm$ 3.94                       | 43.15 $\pm$ 24.15 | 3.57 $\pm$ 3.32 | 9.28 $\pm$ 7.38  |
| <b>SED 43</b>             | 5.87 $\pm$ 0.77                       | 50.91 $\pm$ 1.66  | 6.33 $\pm$ 2.69 | 9.15 $\pm$ 5.08  |
| <b>SED 43 MEM</b>         | 7.22 $\pm$ 4.89                       | 54.85 $\pm$ 21.47 | 2.81 $\pm$ 0.71 | 7.67 $\pm$ 3.38  |
| <b>SED 43 TOB 4</b>       | 8.24 $\pm$ 5.37                       | 67.24 $\pm$ 4.40  | 6.65 $\pm$ 1.85 | 8.92 $\pm$ 4.27  |
| <b>SED 43 TOB 200</b>     | 3.75 $\pm$ 1.97                       | 39.70 $\pm$ 12.58 | 4.76 $\pm$ 1.25 | 5.51 $\pm$ 4.02  |
| <b>SED 43 MEM/TOB 4</b>   | 1.42 $\pm$ 0.98                       | 33.83 $\pm$ 15.35 | 2.65 $\pm$ 3.77 | 7.50 $\pm$ 1.94  |
| <b>SED 43 MEM/TOB 200</b> | 2.20 $\pm$ 1.17                       | 31.07 $\pm$ 4.40  | 0.77 $\pm$ 0.34 | 9.29 $\pm$ 5.74  |
| <b>SED 43 CIP</b>         | 4.22 $\pm$ 3.04                       | 37.55 $\pm$ 9.61  | 3.43 $\pm$ 3.27 | 14.52 $\pm$ 3.18 |

**Supplementary Table S2.** Fold increase in total concentration of protease and pyocyanin produced under different treatments. Blue and orange coloured values are indicating an increased and decreased percentage, respectively, in comparison to non-antibiotic treated tissues.

| Conditions        | Fold increase  |                 |
|-------------------|----------------|-----------------|
|                   | Total protease | Total pyocyanin |
| PA14              | 100            | 100             |
| PA14 MEM          | 126            | 106             |
| SED 20            | 100            | 100             |
| SED 20 MEM        | 132            | 68              |
| SED 41            | 100            | 100             |
| SED 41 MEM        | 160            | 162             |
| SED 43            | 100            | 100             |
| SED 43 MEM        | 109            | 68              |
| SED 43 TOB4       | 133            | 101             |
| SED 43 TOB200     | 77             | 66              |
| SED 43 MEM/TOB4   | 62             | 66              |
| SED 43 MEM/TOB200 | 59             | 65              |
| SED 43 CIP        | 74             | 116             |
